# Supplementary material for: Global economic cost of smoking-attributable diseases
Source: PubMed Central journal article supplement — Tob Control. 2017 Jan 30;27(1):58–64. doi: 10.1136/tobaccocontrol-2016-053305 (PMC5801657; doi:10.1136/tobaccocontrol-2016-053305), 2017-01-30
Supplement: tobaccocontrol-2016-053305supp001.pdf [file tobaccocontrol-2016-053305supp001.pdf]

Supplementary file

| UN Member State<br>Name | Country classification, exchange rate,<br>and smoking-Attributable Death rate |               |               |             | Smoking-Attributable Health<br>Expenditure |             |              | Total Economic Cost<br>Attributable to Smoking |             |              |
|-------------------------|-------------------------------------------------------------------------------|---------------|---------------|-------------|--------------------------------------------|-------------|--------------|------------------------------------------------|-------------|--------------|
|                         | Income<br>Group                                                               | WHO<br>Region | PPP\$<br>Rate | SAD<br>Rate | PPP\$<br>(Mn)                              | NCU<br>(Mn) | % THE<br>(%) | PPP\$<br>(Mn)                                  | NCU<br>(Mn) | % GDP<br>(%) |
| Afghanistan             | LIC                                                                           | EMR           | 18.5          | 375         | 438                                        | 8,096       | 9.2%         | 1,195                                          | 22,078      | 2.1%         |
| Albania                 | UMIC                                                                          | EUR           | 46.9          | 287         | 113                                        | 5,323       | 7.1%         | 739                                            | 34,680      | 2.5%         |
| Algeria                 | UMIC                                                                          | AFR           | 31.7          | 90          | 666                                        | 21,087      | 2.2%         | 5,330                                          | 168,775     | 1.1%         |
| Argentina               | UMIC                                                                          | AMR           | 2.9           | 192         | 3,014                                      | 8,772       | 4.7%         | 13,992                                         | 40,719      | 1.6%         |
| Armenia                 | LMIC                                                                          | EUR           | 181.6         | 512         | 125                                        | 22,634      | 12.6%        | 863                                            | 156,761     | 3.9%         |
| Australia               | HIC                                                                           | WPR           | 1.5           | 170         | 4,046                                      | 6,181       | 4.3%         | 13,421                                         | 20,499      | 1.3%         |
| Austria                 | HIC                                                                           | EUR           | 0.8           | 188         | 2,347                                      | 1,976       | 5.8%         | 8,015                                          | 6,748       | 2.1%         |
| Azerbaijan              | UMIC                                                                          | EUR           | 0.5           | 207         | 417                                        | 229         | 5.1%         | 2,526                                          | 1,387       | 1.7%         |
| Bahamas                 | HIC                                                                           | AMR           | 1.0           | 67          | 10                                         | 10          | 1.6%         | 41                                             | 39          | 0.5%         |
| Bahrain                 | HIC                                                                           | EMR           | 0.3           | 94          | 50                                         | 16          | 2.3%         | 136                                            | 44          | 0.2%         |
| Bangladesh              | LIC                                                                           | SEAR          | 24.7          | 255         | 884                                        | 21,819      | 6.7%         | 6,426                                          | 158,578     | 1.4%         |
| Barbados                | HIC                                                                           | AMR           | 1.4           | 28          | 3                                          | 4           | 0.7%         | 11                                             | 16          | 0.2%         |
| Belarus                 | UMIC                                                                          | EUR           | 3,258         | 344         | 692                                        | 2,254,533   | 8.5%         | 4,597                                          | 14,975,636  | 2.8%         |
| Belgium                 | HIC                                                                           | EUR           | 0.8           | 295         | 3,085                                      | 2,621       | 6.4%         | 11,303                                         | 9,600       | 2.4%         |
| Belize                  | UMIC                                                                          | AMR           | 1.1           | 85          | 3                                          | 4           | 2.1%         | 9                                              | 11          | 0.3%         |
| Benin                   | LIC                                                                           | AFR           | 223.3         | 27          | 6                                          | 1,276       | 0.7%         | 17                                             | 3,748       | 0.1%         |
| Bhutan                  | LMIC                                                                          | SEAR          | 18.3          | 122         | 6                                          | 108         | 3.0%         | 66                                             | 1,215       | 1.3%         |
| Bolivia                 | LMIC                                                                          | AMR           | 3.1           | 74          | 64                                         | 197         | 1.8%         | 156                                            | 482         | 0.3%         |
| Bosnia and Herzegovina  | UMIC                                                                          | EUR           | 0.7           | 303         | 267                                        | 194         | 7.5%         | 1,227                                          | 891         | 3.4%         |
| Botswana                | UMIC                                                                          | AFR           | 3.8           | 60          | 24                                         | 90          | 1.5%         | 119                                            | 447         | 0.4%         |

|                          |      |     |         |     |        |         |      |         |           |      |
|--------------------------|------|-----|---------|-----|--------|---------|------|---------|-----------|------|
| Brazil                   | UMIC | AMR | 1.5     | 143 | 16,955 | 25,722  | 6.1% | 48,140  | 73,031    | 1.6% |
| Brunei Darussalam        | HIC  | WPR | 0.7     | 102 | 17     | 12      | 2.5% | 270     | 190       | 0.9% |
| Bulgaria                 | UMIC | EUR | 0.7     | 296 | 343    | 232     | 4.0% | 4,458   | 3,011     | 3.7% |
| Burkina Faso             | LIC  | AFR | 214.0   | 100 | 39     | 8,251   | 2.5% | 59      | 12,668    | 0.2% |
| Burundi                  | LIC  | AFR | 483.0   | 47  | 7      | 3,460   | 1.2% | 12      | 5,955     | 0.2% |
| Cabo Verde               | LMIC | AFR | 48.1    | 15  | 1      | 25      | 0.4% | 3       | 120       | 0.1% |
| Cambodia                 | LIC  | WPR | 1,343.0 | 217 | 166    | 223,137 | 5.4% | 669     | 898,311   | 1.6% |
| Cameroon                 | LMIC | AFR | 239.9   | 56  | 39     | 9,259   | 1.4% | 117     | 28,184    | 0.2% |
| Canada                   | HIC  | AMR | 1.2     | 239 | 5,851  | 7,308   | 3.7% | 25,633  | 32,018    | 1.7% |
| Central African Republic | LIC  | AFR | 258.3   | 56  | 2      | 579     | 1.4% | 8       | 1,963     | 0.2% |
| Chad                     | LIC  | AFR | 259.3   | 68  | 15     | 3,928   | 1.7% | 45      | 11,569    | 0.2% |
| Chile                    | HIC  | AMR | 334.2   | 102 | 704    | 235,343 | 2.5% | 2,224   | 743,256   | 0.6% |
| China                    | UMIC | WPR | 3.5     | 137 | 24,320 | 85,463  | 3.0% | 111,721 | 392,591   | 0.8% |
| Colombia                 | UMIC | AMR | 1,178.1 | 84  | 799    | 941,796 | 2.1% | 2,900   | 3,416,058 | 0.5% |
| Comoros                  | LIC  | AFR | 209.3   | 20  | 0      | 73      | 0.5% | 1       | 285       | 0.1% |
| Costa Rica               | UMIC | AMR | 354.7   | 55  | 88     | 31,247  | 1.4% | 181     | 64,228    | 0.3% |
| Côte d'Ivoire            | LMIC | AFR | 227.2   | 151 | 133    | 30,333  | 3.7% | 261     | 59,394    | 0.4% |
| Croatia                  | HIC  | EUR | 3.8     | 319 | 496    | 1,869   | 7.9% | 2,722   | 10,251    | 3.1% |
| Cuba                     | UMIC | AMR | 0.8     | 234 | 1,133  | 878     | 5.8% | 4,751   | 3,682     | 3.9% |
| Cyprus                   | HIC  | EUR | 0.7     | 101 | 70     | 47      | 3.6% | 216     | 145       | 0.7% |
| Czech Republic           | HIC  | EUR | 13.6    | 296 | 1,948  | 26,416  | 9.1% | 7,615   | 103,265   | 2.5% |
| Denmark                  | HIC  | EUR | 7.8     | 358 | 2,146  | 16,711  | 8.3% | 6,516   | 50,730    | 2.7% |
| Djibouti                 | LMIC | EMR | 98.0    | 19  | 1      | 97      | 0.5% | 4       | 438       | 0.2% |
| Dominican Republic       | UMIC | AMR | 20.1    | 150 | 230    | 4,626   | 3.7% | 851     | 17,110    | 0.7% |
| Ecuador                  | UMIC | AMR | 0.5     | 34  | 86     | 47      | 0.8% | 262     | 141       | 0.2% |
| Egypt                    | LMIC | EMR | 1.8     | 94  | 997    | 1,790   | 2.3% | 10,206  | 18,324    | 1.2% |
| El Salvador              | LMIC | AMR | 0.5     | 7   | 6      | 3       | 0.2% | 76      | 40        | 0.2% |

|                   |      |      |         |     |        |            |       |         |             |      |
|-------------------|------|------|---------|-----|--------|------------|-------|---------|-------------|------|
| Equatorial Guinea | HIC  | AFR  | 318.4   | 80  | 18     | 5,694      | 2.0%  | 135     | 43,133      | 0.5% |
| Estonia           | HIC  | EUR  | 0.5     | 349 | 156    | 85         | 8.3%  | 886     | 484         | 2.7% |
| Ethiopia          | LIC  | AFR  | 6.5     | 31  | 43     | 280        | 0.8%  | 214     | 1,391       | 0.2% |
| Finland           | HIC  | EUR  | 0.9     | 155 | 1,001  | 926        | 5.3%  | 2,798   | 2,589       | 1.3% |
| France            | HIC  | EUR  | 0.9     | 193 | 16,779 | 14,394     | 6.1%  | 58,195  | 49,922      | 2.3% |
| Gabon             | UMIC | AFR  | 304.1   | 109 | 29     | 8,965      | 2.7%  | 195     | 59,221      | 0.6% |
| Gambia            | LIC  | AFR  | 10.2    | 63  | 3      | 28         | 1.6%  | 5       | 52          | 0.2% |
| Georgia           | LMIC | EUR  | 0.9     | 119 | 82     | 70         | 2.9%  | 724     | 619         | 2.4% |
| Germany           | HIC  | EUR  | 0.8     | 215 | 17,382 | 13,767     | 4.6%  | 73,490  | 58,205      | 2.1% |
| Ghana             | LMIC | AFR  | 0.8     | 28  | 34     | 27         | 0.7%  | 123     | 97          | 0.1% |
| Greece            | HIC  | EUR  | 0.7     | 238 | 1,676  | 1,147      | 6.4%  | 6,815   | 4,663       | 2.4% |
| Guatemala         | LMIC | AMR  | 3.7     | 78  | 133    | 489        | 1.9%  | 384     | 1,414       | 0.4% |
| Guinea            | LIC  | AFR  | 2,794.2 | 95  | 15     | 41,712     | 2.3%  | 58      | 160,721     | 0.4% |
| Guinea-Bissau     | LIC  | AFR  | 201.8   | 49  | 2      | 324        | 1.2%  | 4       | 834         | 0.2% |
| Guyana            | LMIC | AMR  | 118.9   | 34  | 3      | 316        | 0.8%  | 29      | 3,409       | 0.6% |
| Haiti             | LIC  | AMR  | 26.3    | 18  | 5      | 137        | 0.4%  | 45      | 1,191       | 0.3% |
| Honduras          | LMIC | AMR  | 10.1    | 121 | 100    | 1,019      | 3.0%  | 199     | 2,020       | 0.6% |
| Hungary           | UMIC | EUR  | 127.4   | 495 | 2,086  | 265,852    | 11.9% | 12,302  | 1,567,437   | 5.4% |
| Iceland           | HIC  | EUR  | 138.2   | 206 | 56     | 7,786      | 5.1%  | 189     | 26,135      | 1.4% |
| India             | LMIC | SEAR | 15.9    | 112 | 8,369  | 133,198    | 3.5%  | 114,276 | 1,818,691   | 1.8% |
| Indonesia         | LMIC | SEAR | 3,700.0 | 245 | 4,075  | 15,075,983 | 6.0%  | 172,752 | 639,173,131 | 1.8% |
| Iran              | UMIC | EMR  | 4,849.0 | 48  | 1,094  | 5,303,095  | 1.2%  | 5,124   | 24,846,407  | 0.4% |
| Iraq              | UMIC | EMR  | 523.3   | 333 | 1,694  | 886,350    | 8.2%  | 7,558   | 3,954,546   | 1.5% |
| Ireland           | HIC  | EUR  | 0.8     | 284 | 1,242  | 1,033      | 7.1%  | 3,398   | 2,826       | 1.6% |
| Israel            | HIC  | EUR  | 4.0     | 114 | 476    | 1,898      | 2.6%  | 2,355   | 9,391       | 1.0% |
| Italy             | HIC  | EUR  | 0.8     | 211 | 11,799 | 9,069      | 6.3%  | 33,877  | 26,041      | 1.6% |
| Jamaica           | UMIC | AMR  | 61.3    | 155 | 46     | 2,832      | 3.8%  | 252     | 15,481      | 1.1% |

|            |      |      |         |     |        |           |       |        |           |      |
|------------|------|------|---------|-----|--------|-----------|-------|--------|-----------|------|
| Japan      | HIC  | WPR  | 105.2   | 200 | 17,598 | 1,850,838 | 3.8%  | 39,249 | 4,127,905 | 0.9% |
| Jordan     | UMIC | EMR  | 0.6     | 109 | 156    | 91        | 2.7%  | 869    | 505       | 1.2% |
| Kazakhstan | UMIC | EUR  | 82.6    | 555 | 2,167  | 178,970   | 13.7% | 13,761 | 1,136,541 | 3.7% |
| Kenya      | LIC  | AFR  | 36.0    | 35  | 36     | 1,296     | 0.9%  | 83     | 2,978     | 0.1% |
| Kuwait     | HIC  | EMR  | 0.3     | 9   | 16     | 6         | 0.2%  | 67     | 23        | 0.0% |
| Kyrgyzstan | LMIC | EUR  | 19.0    | 260 | 73     | 1,387     | 6.4%  | 340    | 6,450     | 2.1% |
| Lao PDR    | LMIC | WPR  | 2,533.2 | 284 | 40     | 100,851   | 7.0%  | 429    | 1,086,450 | 1.5% |
| Latvia     | HIC  | EUR  | 0.4     | 326 | 208    | 85        | 8.1%  | 1,418  | 577       | 3.2% |
| Lebanon    | UMIC | EMR  | 869.8   | 121 | 223    | 194,366   | 4.2%  | 826    | 718,082   | 1.1% |
| Lesotho    | LMIC | AFR  | 3.8     | 73  | 11     | 42        | 1.8%  | 20     | 78        | 0.4% |
| Liberia    | LIC  | AFR  | 38.2    | 47  | 4      | 140       | 1.2%  | 8      | 315       | 0.3% |
| Libya      | UMIC | EMR  | 0.7     | 65  | 116    | 84        | 1.6%  | 1,500  | 1,080     | 1.0% |
| Lithuania  | HIC  | EUR  | 1.6     | 282 | 395    | 629       | 8.3%  | 2,339  | 3,730     | 3.2% |
| Luxembourg | HIC  | EUR  | 0.9     | 214 | 217    | 200       | 6.5%  | 740    | 682       | 1.6% |
| Macedonia  | UMIC | EUR  | 18.8    | 250 | 103    | 1,946     | 6.2%  | 852    | 16,065    | 3.4% |
| Madagascar | LIC  | AFR  | 703.0   | 32  | 8      | 5,652     | 0.8%  | 118    | 83,042    | 0.4% |
| Malaysia   | UMIC | WPR  | 1.4     | 209 | 1,347  | 1,946     | 5.2%  | 10,926 | 15,785    | 1.7% |
| Mali       | LIC  | AFR  | 218.0   | 49  | 18     | 3,838     | 1.2%  | 30     | 6,530     | 0.1% |
| Malta      | HIC  | EUR  | 0.6     | 150 | 58     | 33        | 5.5%  | 203    | 116       | 1.6% |
| Mauritania | LMIC | AFR  | 107.5   | 33  | 4      | 411       | 0.8%  | 13     | 1,448     | 0.1% |
| Mauritius  | UMIC | AFR  | 16.2    | 102 | 25     | 410       | 2.5%  | 219    | 3,532     | 1.0% |
| Mexico     | UMIC | AMR  | 7.7     | 65  | 5,345  | 40,982    | 4.3%  | 7,450  | 57,127    | 0.4% |
| Moldova    | LMIC | EUR  | 5.9     | 273 | 119    | 699       | 6.7%  | 571    | 3,353     | 3.8% |
| Mongolia   | LMIC | WPR  | 593.6   | 353 | 129    | 76,622    | 8.7%  | 733    | 435,036   | 2.6% |
| Morocco    | LMIC | EMR  | 3.6     | 82  | 284    | 1,032     | 2.0%  | 4,509  | 16,371    | 2.0% |
| Myanmar    | LIC  | SEAR | 485.2   | 344 | 156    | 75,604    | 8.5%  | 5,476  | 2,657,084 | 2.7% |
| Namibia    | UMIC | AFR  | 5.2     | 60  | 25     | 129       | 1.5%  | 65     | 338       | 0.3% |

|                    |      |      |         |     |        |           |       |         |            |      |
|--------------------|------|------|---------|-----|--------|-----------|-------|---------|------------|------|
| Nepal              | LIC  | SEAR | 25.8    | 134 | 108    | 2,774     | 3.3%  | 889     | 22,942     | 1.5% |
| Netherlands        | HIC  | EUR  | 0.8     | 268 | 7,085  | 5,965     | 7.9%  | 20,112  | 16,933     | 2.6% |
| New Zealand        | HIC  | WPR  | 1.5     | 196 | 701    | 1,040     | 4.8%  | 2,197   | 3,257      | 1.5% |
| Nicaragua          | LMIC | AMR  | 9.6     | 70  | 37     | 351       | 1.7%  | 138     | 1,319      | 0.5% |
| Norway             | HIC  | EUR  | 8.9     | 209 | 1,558  | 13,925    | 5.2%  | 4,958   | 44,319     | 1.5% |
| Oman               | HIC  | EMR  | 0.3     | 32  | 18     | 6         | 0.8%  | 145     | 47         | 0.1% |
| Pakistan           | LMIC | EMR  | 25.3    | 128 | 694    | 17,539    | 3.2%  | 5,666   | 143,208    | 0.7% |
| Panama             | UMIC | AMR  | 0.6     | 48  | 59     | 33        | 1.2%  | 249     | 139        | 0.4% |
| Papua New Guinea   | LMIC | WPR  | 1.9     | 4   | 1      | 2         | 0.1%  | 58      | 108        | 0.4% |
| Paraguay           | LMIC | AMR  | 2,293.0 | 97  | 110    | 251,956   | 2.4%  | 507     | 1,163,669  | 1.1% |
| Peru               | UMIC | AMR  | 1.5     | 50  | 208    | 317       | 1.2%  | 1,083   | 1,653      | 0.3% |
| Philippines        | LMIC | WPR  | 17.9    | 200 | 1,290  | 23,060    | 4.9%  | 15,062  | 269,326    | 2.5% |
| Poland             | HIC  | EUR  | 1.9     | 353 | 3,839  | 7,115     | 6.6%  | 30,792  | 57,073     | 3.5% |
| Portugal           | HIC  | EUR  | 0.6     | 155 | 1,197  | 738       | 4.5%  | 4,960   | 3,061      | 1.8% |
| Qatar              | HIC  | EMR  | 2.6     | 5   | 6      | 17        | 0.1%  | 309     | 801        | 0.1% |
| Romania            | UMIC | EUR  | 1.7     | 295 | 987    | 1,631     | 5.0%  | 14,949  | 24,704     | 4.2% |
| Russian Federation | HIC  | EUR  | 18.5    | 398 | 28,455 | 526,096   | 13.0% | 129,903 | 2,401,699  | 3.8% |
| Rwanda             | LIC  | AFR  | 272.1   | 17  | 8      | 2,099     | 0.4%  | 16      | 4,389      | 0.1% |
| Saudi Arabia       | HIC  | EMR  | 1.9     | 32  | 438    | 819       | 0.8%  | 2,430   | 4,545      | 0.2% |
| Senegal            | LMIC | AFR  | 236.2   | 34  | 11     | 2,563     | 0.8%  | 23      | 5,522      | 0.1% |
| Sierra Leone       | LIC  | AFR  | 1,709.1 | 109 | 28     | 48,285    | 2.7%  | 50      | 85,378     | 0.5% |
| Singapore          | HIC  | WPR  | 0.9     | 157 | 304    | 271       | 1.8%  | 3,493   | 3,105      | 0.9% |
| Slovakia           | HIC  | EUR  | 0.5     | 268 | 681    | 353       | 6.1%  | 3,859   | 2,002      | 2.7% |
| Slovenia           | HIC  | EUR  | 0.6     | 279 | 355    | 218       | 6.6%  | 1,355   | 833        | 2.3% |
| Solomon Islands    | LMIC | WPR  | 6.6     | 25  | 0      | 3         | 0.6%  | 3       | 21         | 0.3% |
| South Africa       | UMIC | AFR  | 4.9     | 234 | 3,297  | 16,157    | 5.8%  | 12,065  | 59,128     | 1.8% |
| South Korea        | HIC  | WPR  | 865.7   | 211 | 8,191  | 7,090,905 | 7.3%  | 16,978  | 14,697,237 | 1.0% |

|                      |      |      |         |     |         |           |      |         |            |      |
|----------------------|------|------|---------|-----|---------|-----------|------|---------|------------|------|
| Spain                | HIC  | EUR  | 0.7     | 185 | 8,217   | 5,740     | 6.0% | 29,738  | 20,773     | 2.0% |
| Sri Lanka            | LMIC | SEAR | 41.4    | 131 | 184     | 7,604     | 3.2% | 2,416   | 99,965     | 1.3% |
| Sudan                | LMIC | EMR  | 1.7     | 13  | 30      | 50        | 0.3% | 63      | 106        | 0.0% |
| Suriname             | UMIC | AMR  | 2.0     | 104 | 10      | 20        | 2.6% | 67      | 134        | 0.8% |
| Swaziland            | LMIC | AFR  | 4.2     | 70  | 11      | 47        | 1.7% | 28      | 116        | 0.3% |
| Sweden               | HIC  | EUR  | 8.9     | 147 | 1,169   | 10,371    | 3.1% | 4,322   | 38,354     | 1.0% |
| Switzerland          | HIC  | EUR  | 1.4     | 153 | 1,614   | 2,291     | 3.4% | 7,090   | 10,063     | 1.6% |
| Syria                | LMIC | EMR  | 28.3    | 53  | 48      | 1,366     | 1.3% | 1,000   | 28,264     | 0.9% |
| Tajikistan           | LIC  | EUR  | 1.9     | 50  | 15      | 29        | 1.2% | 143     | 274        | 0.8% |
| Thailand             | UMIC | SEAR | 12.2    | 174 | 1,512   | 18,429    | 3.6% | 17,084  | 208,199    | 1.8% |
| Timor-Leste          | LMIC | SEAR | 0.6     | 159 | 5       | 3         | 3.9% | 114     | 64         | 1.5% |
| Togo                 | LIC  | AFR  | 225.1   | 33  | 6       | 1,330     | 0.8% | 11      | 2,410      | 0.1% |
| Trinidad and Tobago  | HIC  | AMR  | 3.8     | 90  | 50      | 189       | 2.2% | 493     | 1,858      | 1.2% |
| Tunisia              | UMIC | EMR  | 0.6     | 77  | 155     | 95        | 1.9% | 2,086   | 1,274      | 1.8% |
| Turkey               | UMIC | EUR  | 1.1     | 258 | 4,604   | 4,847     | 6.3% | 39,412  | 41,494     | 2.9% |
| Ukraine              | LMIC | EUR  | 3.7     | 331 | 2,357   | 8,605     | 8.2% | 12,509  | 45,668     | 3.2% |
| United Arab Emirates | HIC  | EMR  | 2.6     | 5   | 20      | 52        | 0.1% | 396     | 1,044      | 0.1% |
| United Kingdom       | HIC  | EUR  | 0.7     | 330 | 11,333  | 7,973     | 5.5% | 43,247  | 30,424     | 1.8% |
| United States        | HIC  | AMR  | 1.0     | 318 | 203,594 | 203,594   | 7.4% | 510,256 | 510,256    | 3.2% |
| Uruguay              | HIC  | AMR  | 16.1    | 243 | 324     | 5,221     | 6.0% | 1,626   | 26,213     | 2.6% |
| Uzbekistan           | LMIC | EUR  | 678.6   | 91  | 196     | 132,697   | 2.2% | 2,446   | 1,660,238  | 1.7% |
| Venezuela            | UMIC | AMR  | 3.0     | 92  | 590     | 1,793     | 2.3% | 3,886   | 11,818     | 0.7% |
| Viet Nam             | LMIC | WPR  | 7,314.4 | 228 | 1,333   | 9,749,871 | 5.0% | 11,568  | 84,610,753 | 2.6% |
| Yemen                | LMIC | EMR  | 75.2    | 80  | 103     | 7,745     | 2.0% | 591     | 44,446     | 0.6% |

PPP\$ Rate = Purchasing Power Parity exchange rate, SAD rate = Smoking-Attributable Death Rate per 100,000 population, PPP\$ = international dollars in millions, NCU = National Currency Units in millions, THE = Total Health Expenditure, GDP = Gross Domestic Product. HIC = High Income, UMIC = Upper Middle Income, LMIC = Lower Middle Income, LIC = Low Income. AFR = Africa, AMR = Americas, EMR = Eastern Mediterranean, EUR = Europe, SEAR = South-East Asia, WPR = Western Pacific
